# Supplementary material for: Fluorescent probes based on the core–shell structure of molecular imprinted materials and gold nanoparticles for highly selective glutathione detection
Source: Royal Society of Chemistry journal article supplement (doi:10.1039/d2ay01363k), 2022-01-01
Supplement: d2ay01363k1.pdf [file d2ay01363k1.pdf]

## Supporting Information

### **Fluorescent probes based on core-shell structure of molecular imprinted materials and gold nanoparticles for highly selective glutathione detection**

Guoli Wu <sup>a</sup>, Yongdan Zhao <sup>b</sup>, Xiaofang Li <sup>c</sup>, Xiaolin Lu <sup>b</sup> and Tingli Qu <sup>b\*</sup>

<sup>a</sup> Department of Pharmacy, Children's Hospital of Shanxi, Taiyuan 030013, China.

<sup>b</sup> College of Pharmacy, Shanxi Medical University, Taiyuan 030001, China.

<sup>c</sup> College of Life Science, Inner Mongolia Agricultural University, huhehot, 010000, China.

\*Correspondence: Tingli Qu, Shanxi Medical University, 56 Xinjian Nan Lu, Taiyuan, 030013, China.  
E-mail: qu\_tingli@163.com, ORCID: 0000-0002-5219-2724.

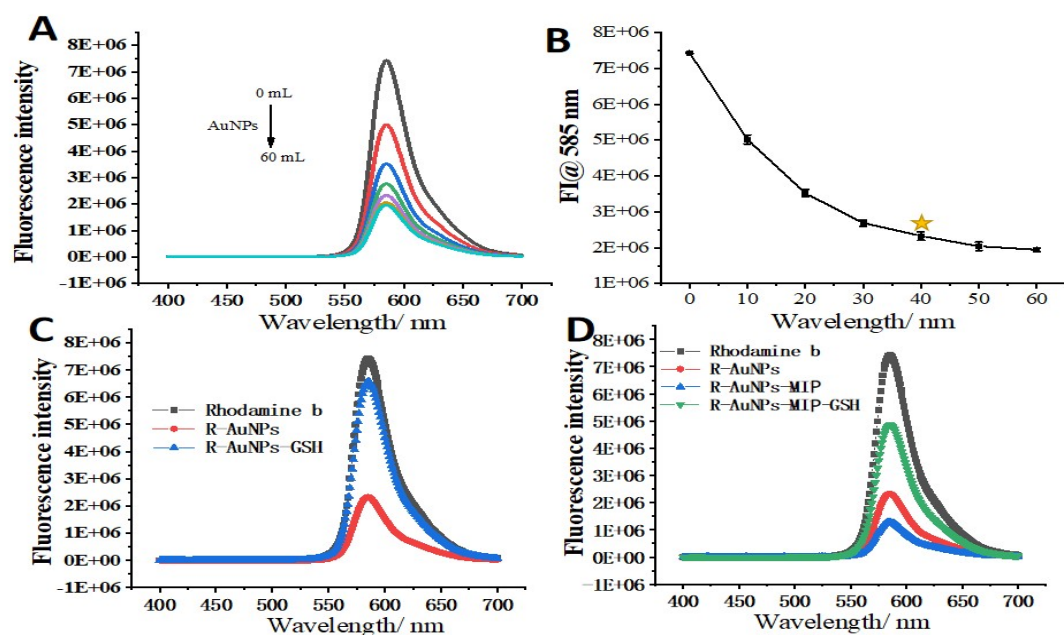

Figure S1. Fluorescence spectra of R-AuNPs, R-AuNPs-MIP under different conditions. (A) Quenching of rhodamine b fluorescence by gold nanoparticles at a series of concentrations. (B) Fluorescence intensity at 585nm after quenching rhodamine B by gold nanoparticles at a series of concentrations. The star illustration represents the concentration selection for subsequent experiments in this paper. (C) Fluorescence intensity comparison of Rhodamine b, R-AuNPs and R-AuNPs with GSH. (D) Fluorescence intensity comparison of Rhodamine b, R-AuNPs and R-AuNPs-MIP, and R-AuNPs-MIP with GSH.

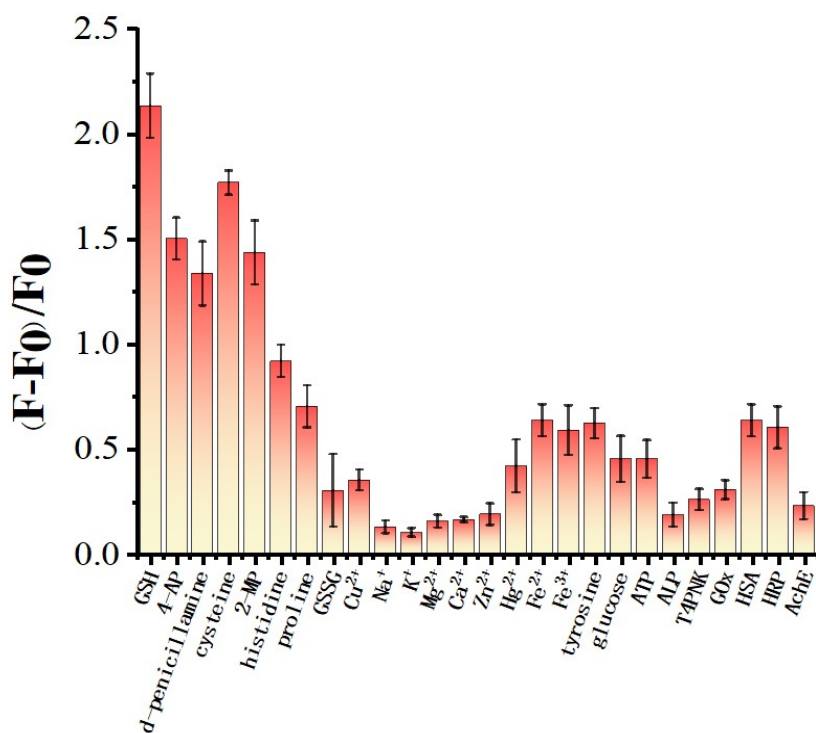

Figure S2. Selective testing of R-AuNPs detection systems.

Table S1. glutathione analysis methods.

| Materials and methods                                                        | Detection range/ $\mu\text{M}$ | LOD/ $\mu\text{M}$ | analysis time*/ min | selectivity                   | Ref.      |
|------------------------------------------------------------------------------|--------------------------------|--------------------|---------------------|-------------------------------|-----------|
| Colorimetric method based on Fe-doped $\text{MoS}_2$ nanomaterials           | 1 - 30                         | 0.577              | 20                  | No obvious interference items | [1]       |
| HPLC with coulometric electrochemical detection                              | 5 - 2000                       | 2.1                | 15                  | #                             | [2]       |
| Ratiometric Fluorescent Probe                                                | 16 - 200                       | 0.89               | 15                  | #                             | [3]       |
| Voltammetric detection based on copper ion complex                           | 1-12.5                         | 0.14               | #                   | No obvious interference items | [4]       |
| Fluorescence Switching of Graphene Quantum Dots                              | 20-500                         | 3.4                | 20                  | No obvious interference items | [5]       |
| Electroanalytical Monitoring based on Novel Pt/SWCNTs-Ionic Liquid           | 0.1-225                        | 0.02               | 15                  | No obvious interference items | [6]       |
| Red-emission carbon dots fluorescent probe                                   | 1-70                           | 0.41               | 5                   | No obvious interference items | [7]       |
| Core-shell structure of molecular imprinted materials and gold nanoparticles | 0-100                          | 0.18               | 15                  | No obvious interference items | This work |

\*:Time required to test or prepare for testing, excluding preparation of materials.

#: Not mentioned in the paper

- [1] P. Singh, RP. Ojha, S. Kumar, AK. Singh, R. Prakash, Materials Physics and Chemistry, 2021, 267, 124684.
- [2] R. Kandar, P. Zakova, M. Markova, H. Lotkova, O. Kucera, Z. Cervinkova, Collection of Czechoslovak Chemical Communications, 2011, 76, 277-294.
- [3] RJ. Yang, Y. Tang, WP. Zhu, Chemical journal of chinese universities, 2016, 37, 643-647.
- [4] MCC. Areias, K. Shimizu, Analyst, 2016, 141, 2904-2910.
- [5] XY. Li, Q. Zhang, N. Wang, JJ. Liu, J. Wang, Chinese journal of analytical chemistry, 2020, 48, 339-346.
- [6] FH. Moghadam, MA. Taher, H. Agheli, Topics in Catalysis, 2022, 65, 677-683.
- [7] G. Ning, B. Li, JJ. Liu, Q. Xiao, S. Huang, Analytical and bioanalytical chemistry, 2022, 414, 2219-2233.
